# Supplementary material for: Mitochondrial matR sequences help to resolve deep phylogenetic relationships in rosids
Source: PubMed Central journal article supplement (PMC2222252; doi:10.1186/1471-2148-7-217), 2007-11-10
Supplement: 1471-2148-7-217-S6.pdf [file 1471-2148-7-217-S6.pdf]

Additional file 6

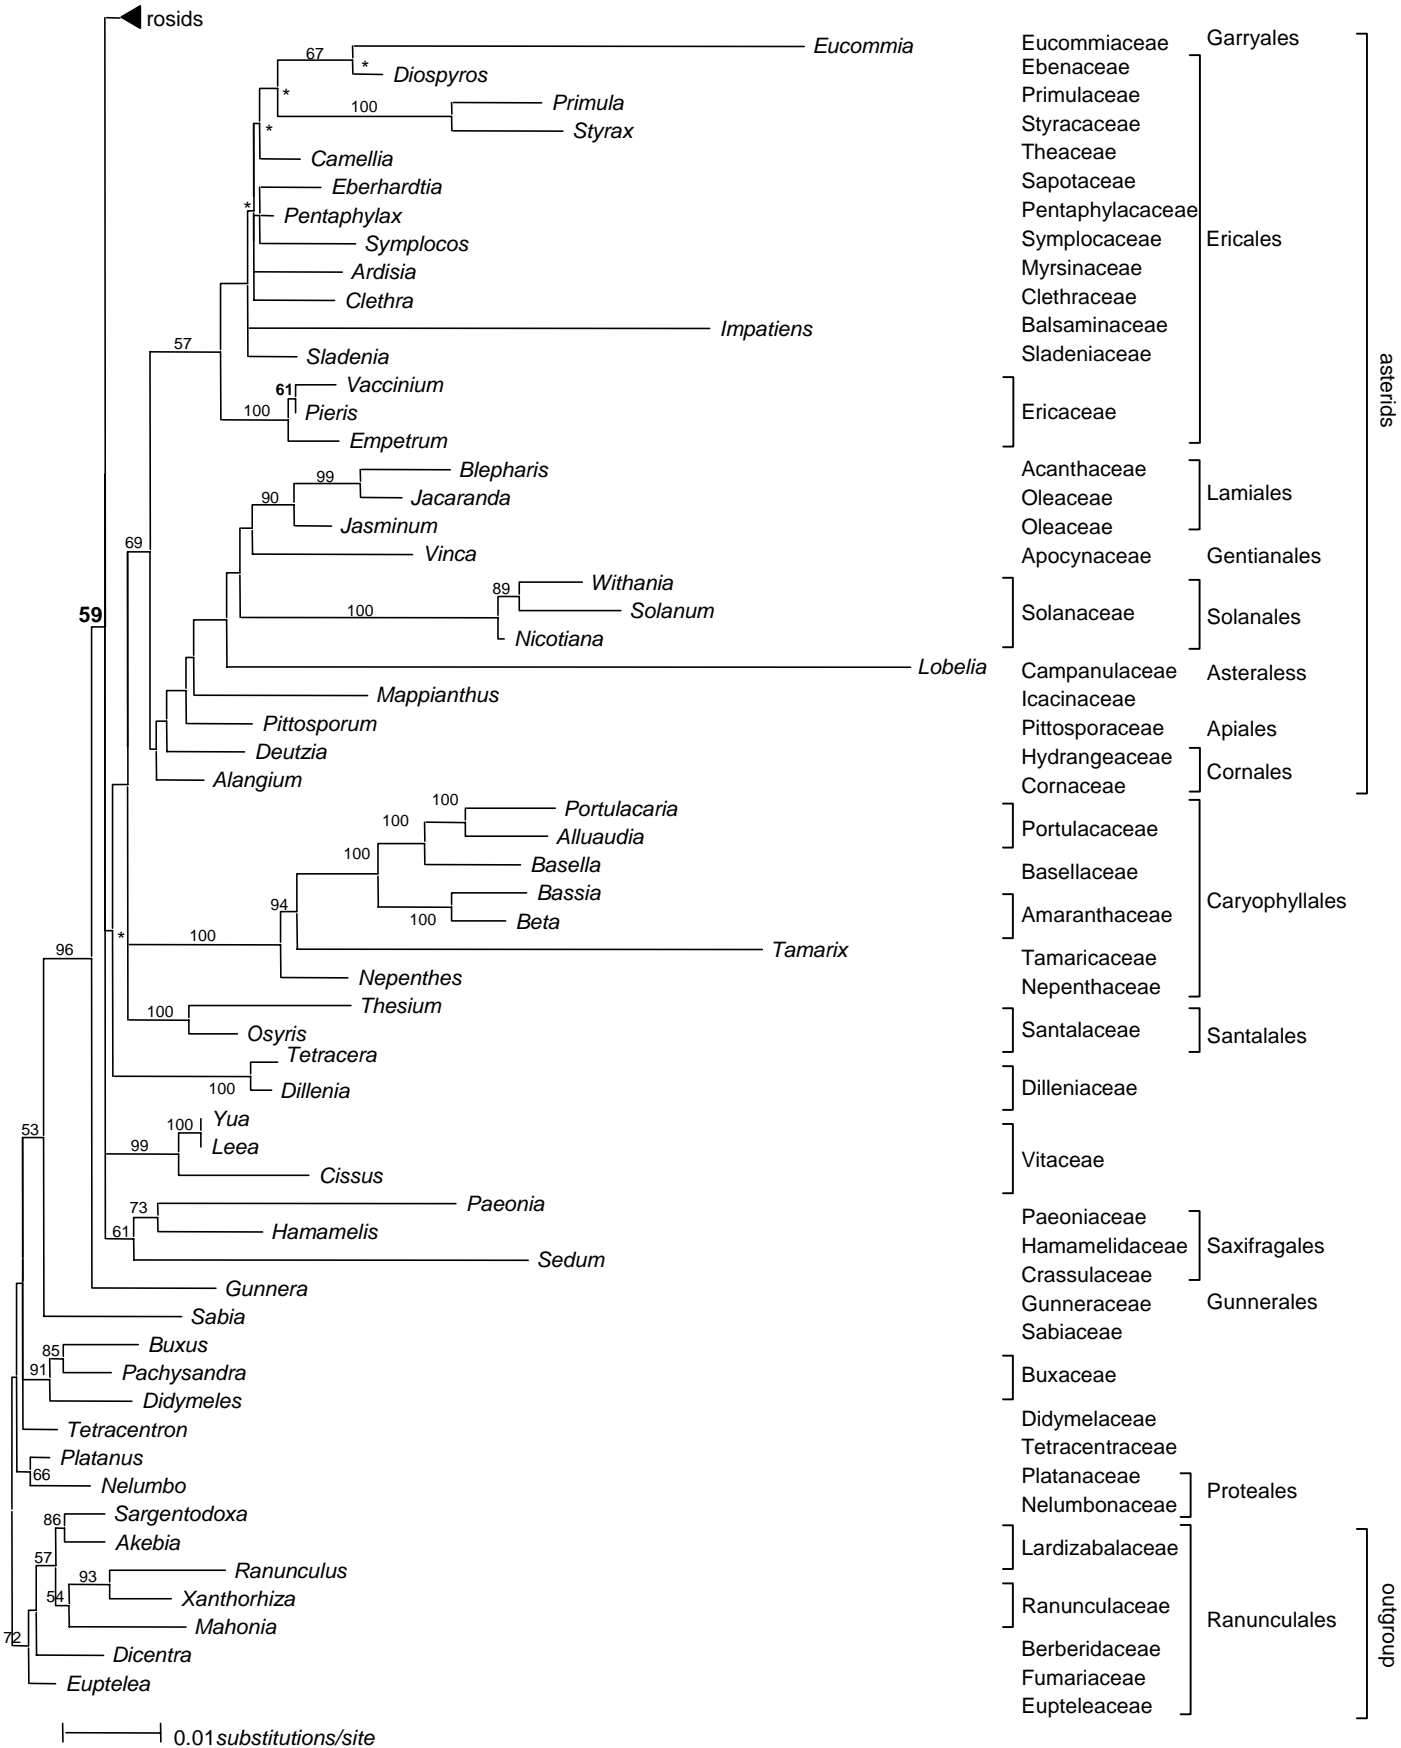

rosid clade

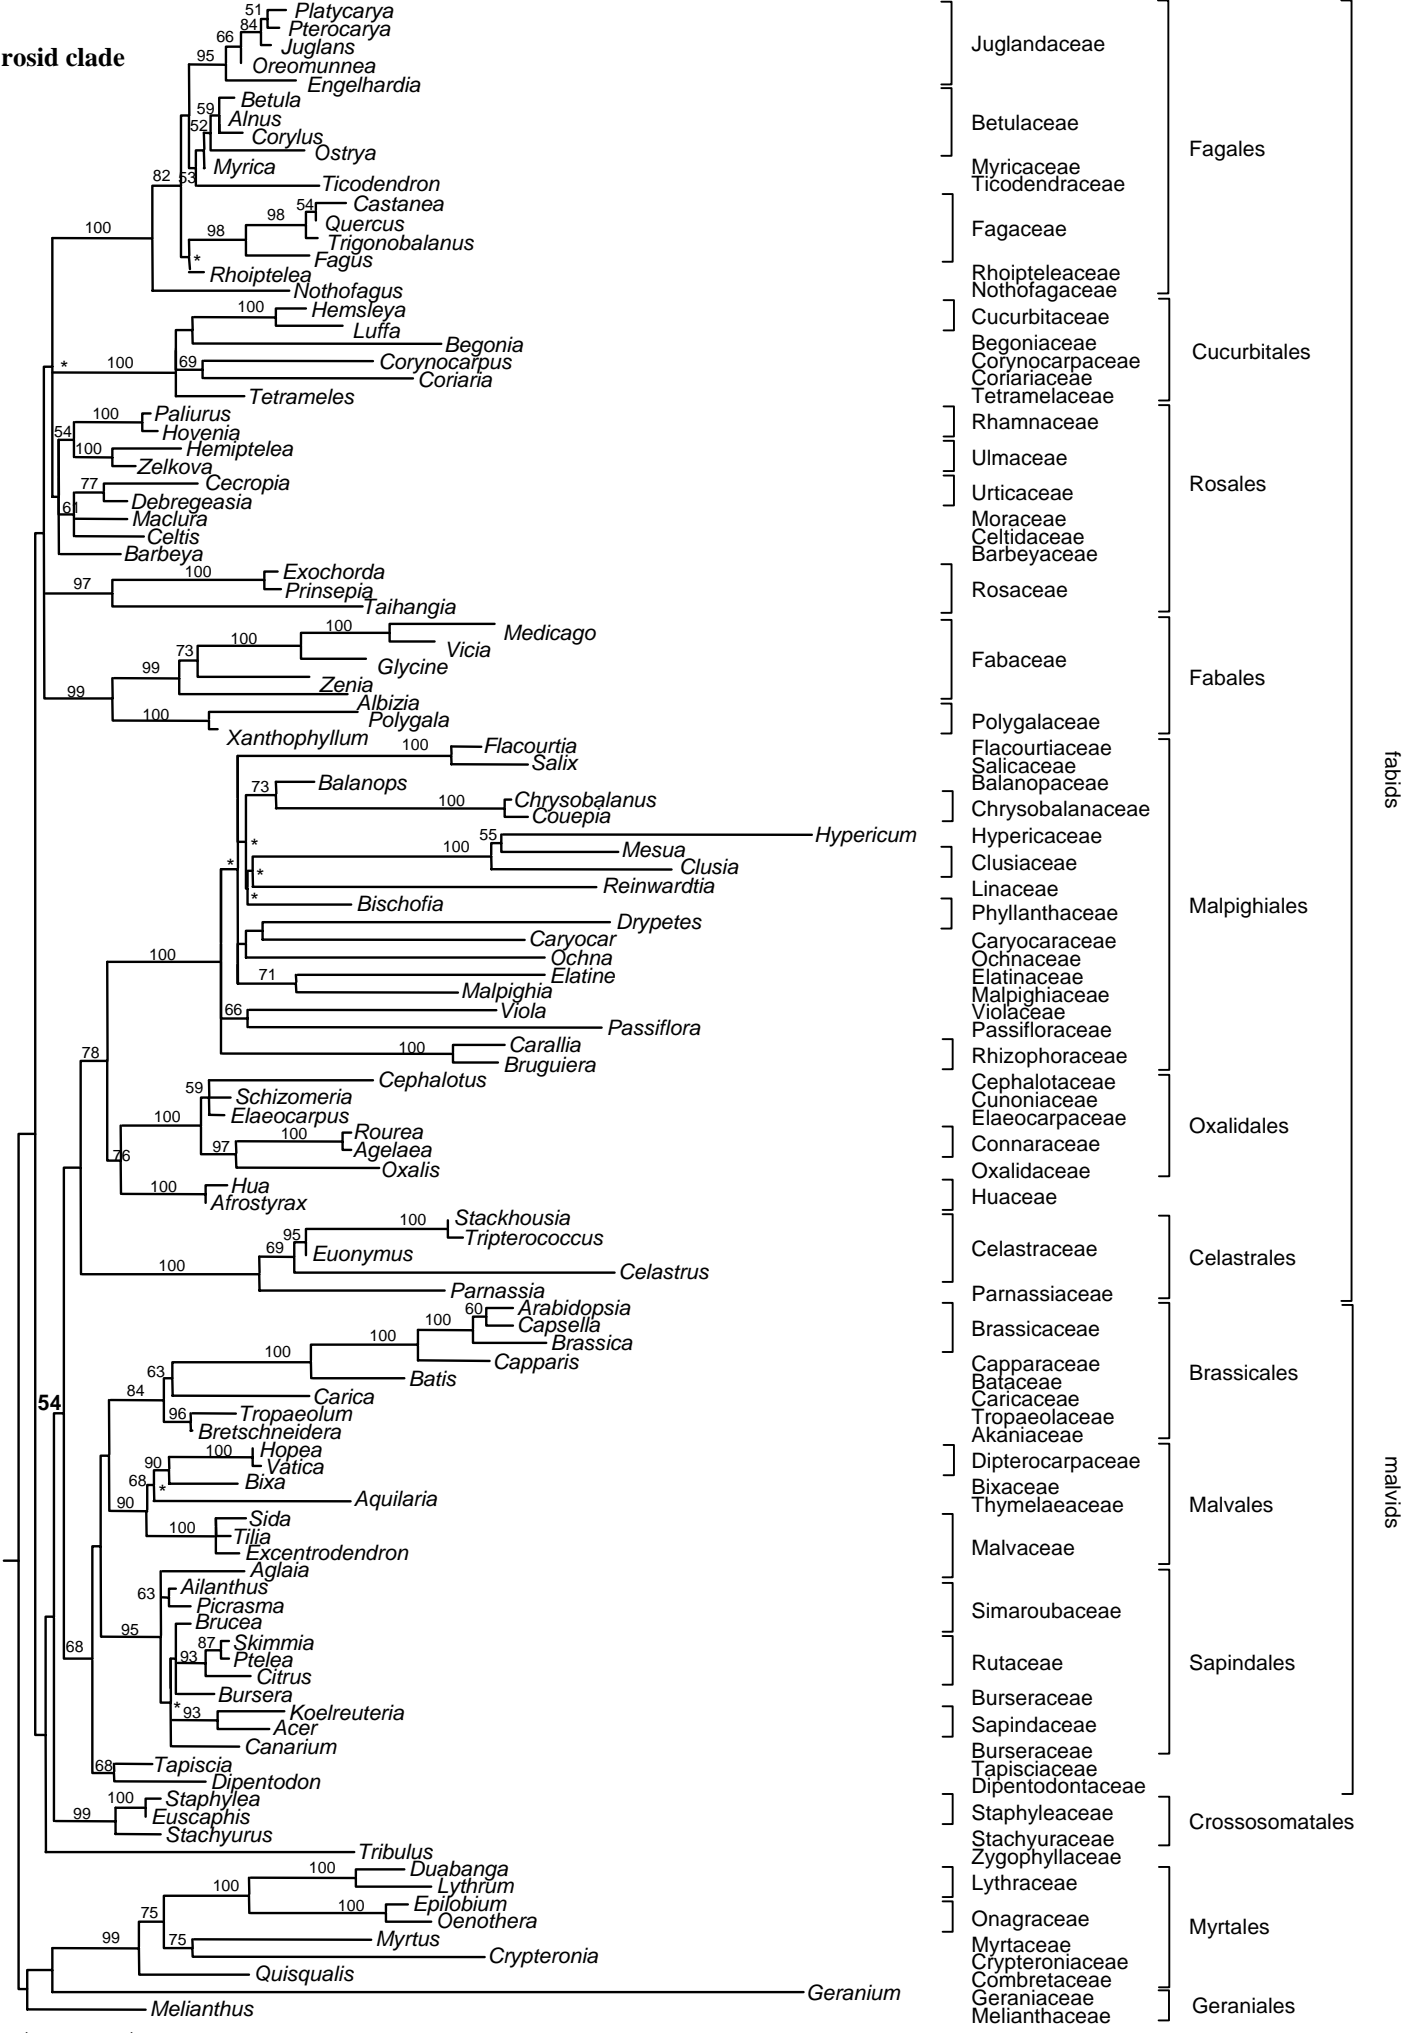

0.01 substitutions/site
