# Supplementary material for: Mitochondrial matR sequences help to resolve deep phylogenetic relationships in rosids
Source: PubMed Central journal article supplement (PMC2222252; doi:10.1186/1471-2148-7-217), 2007-11-10

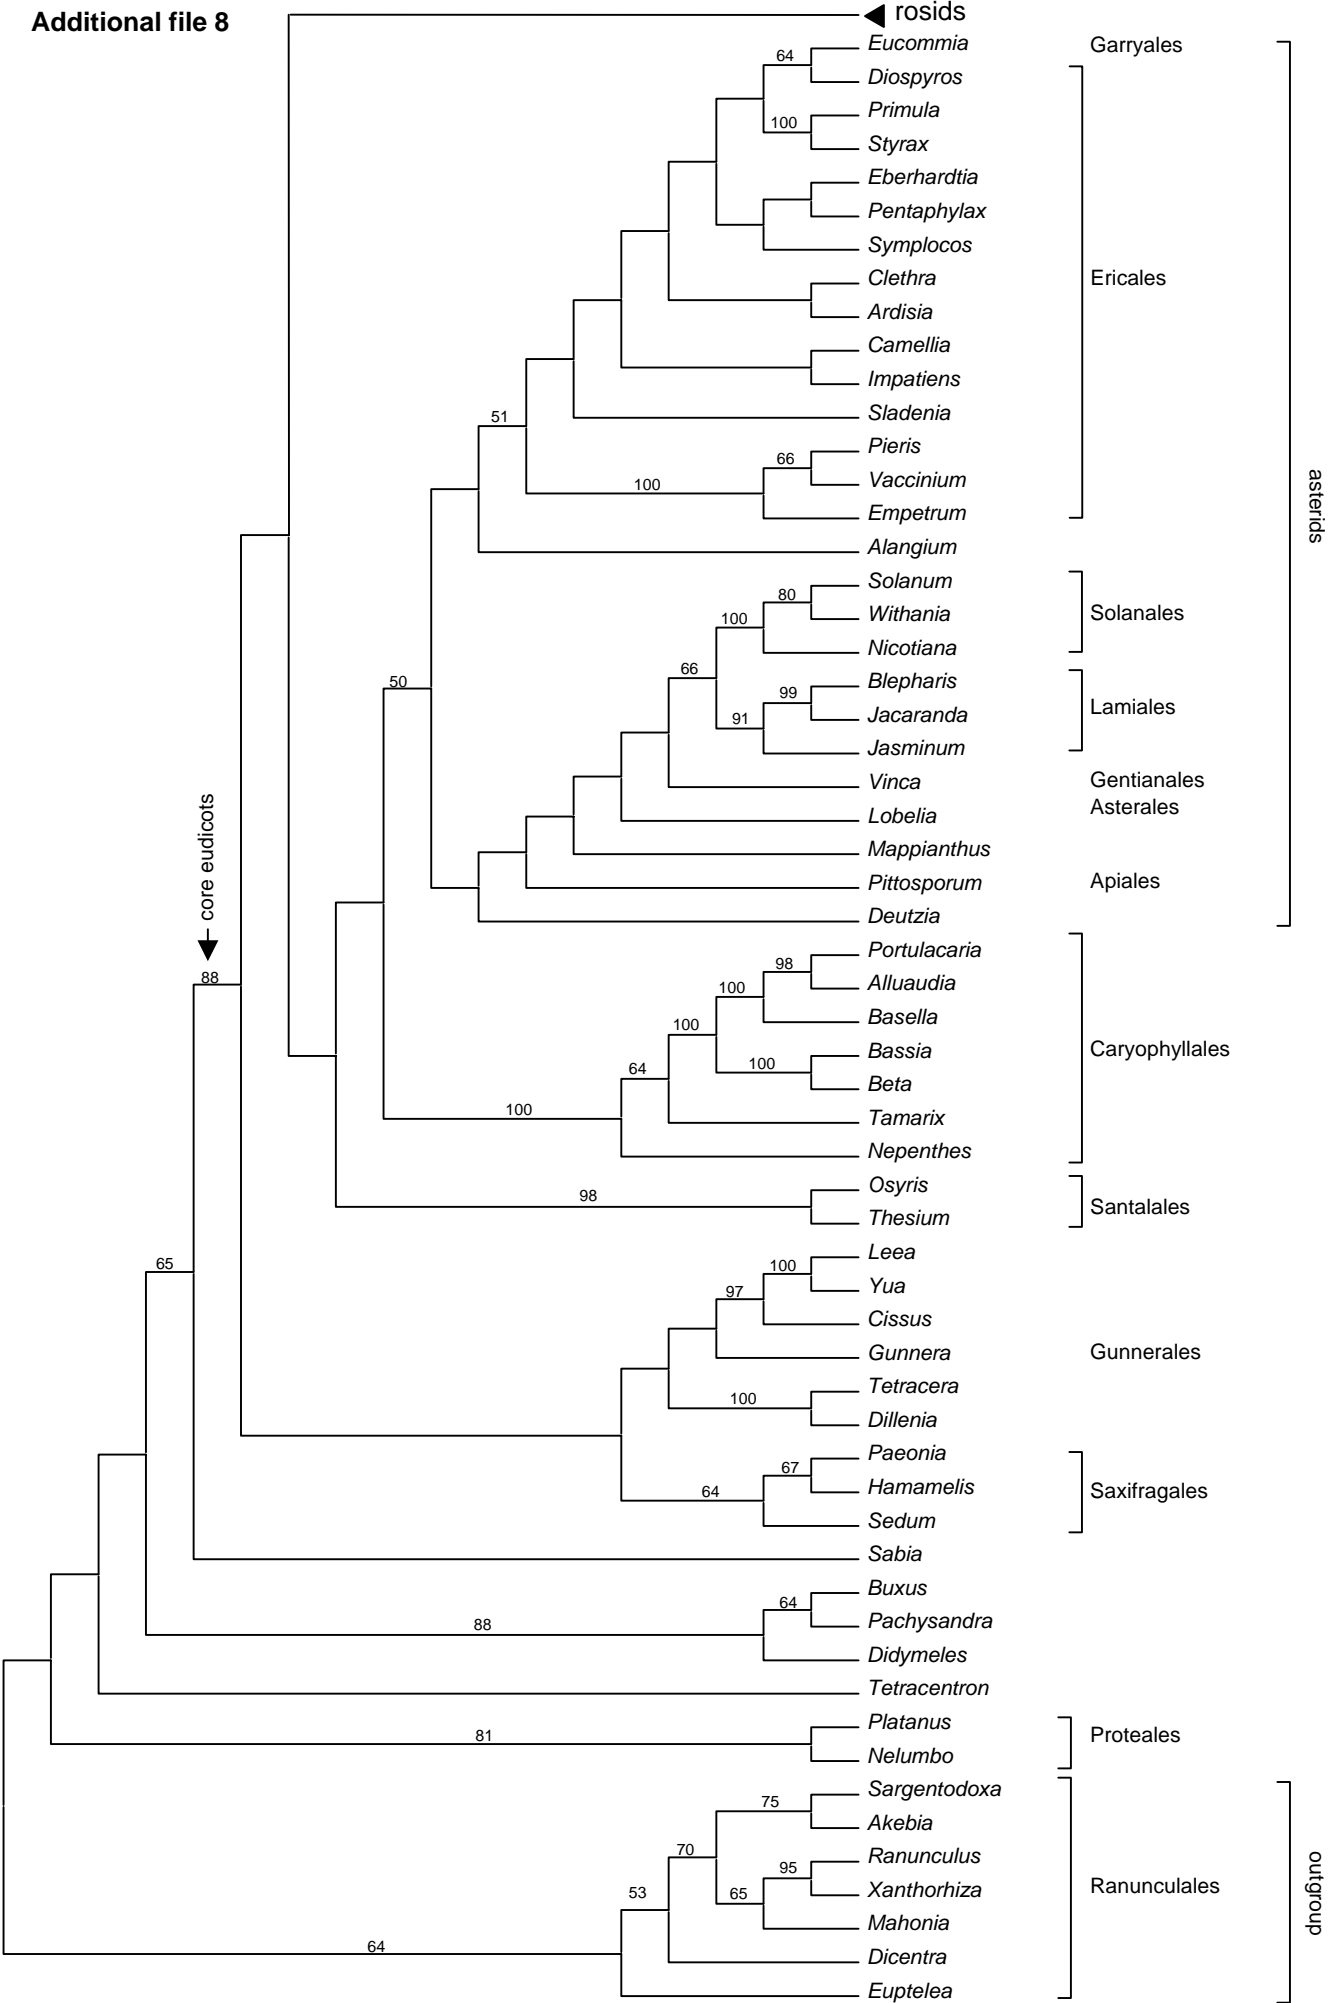

rosids clade

COM clade  
↓

malvids

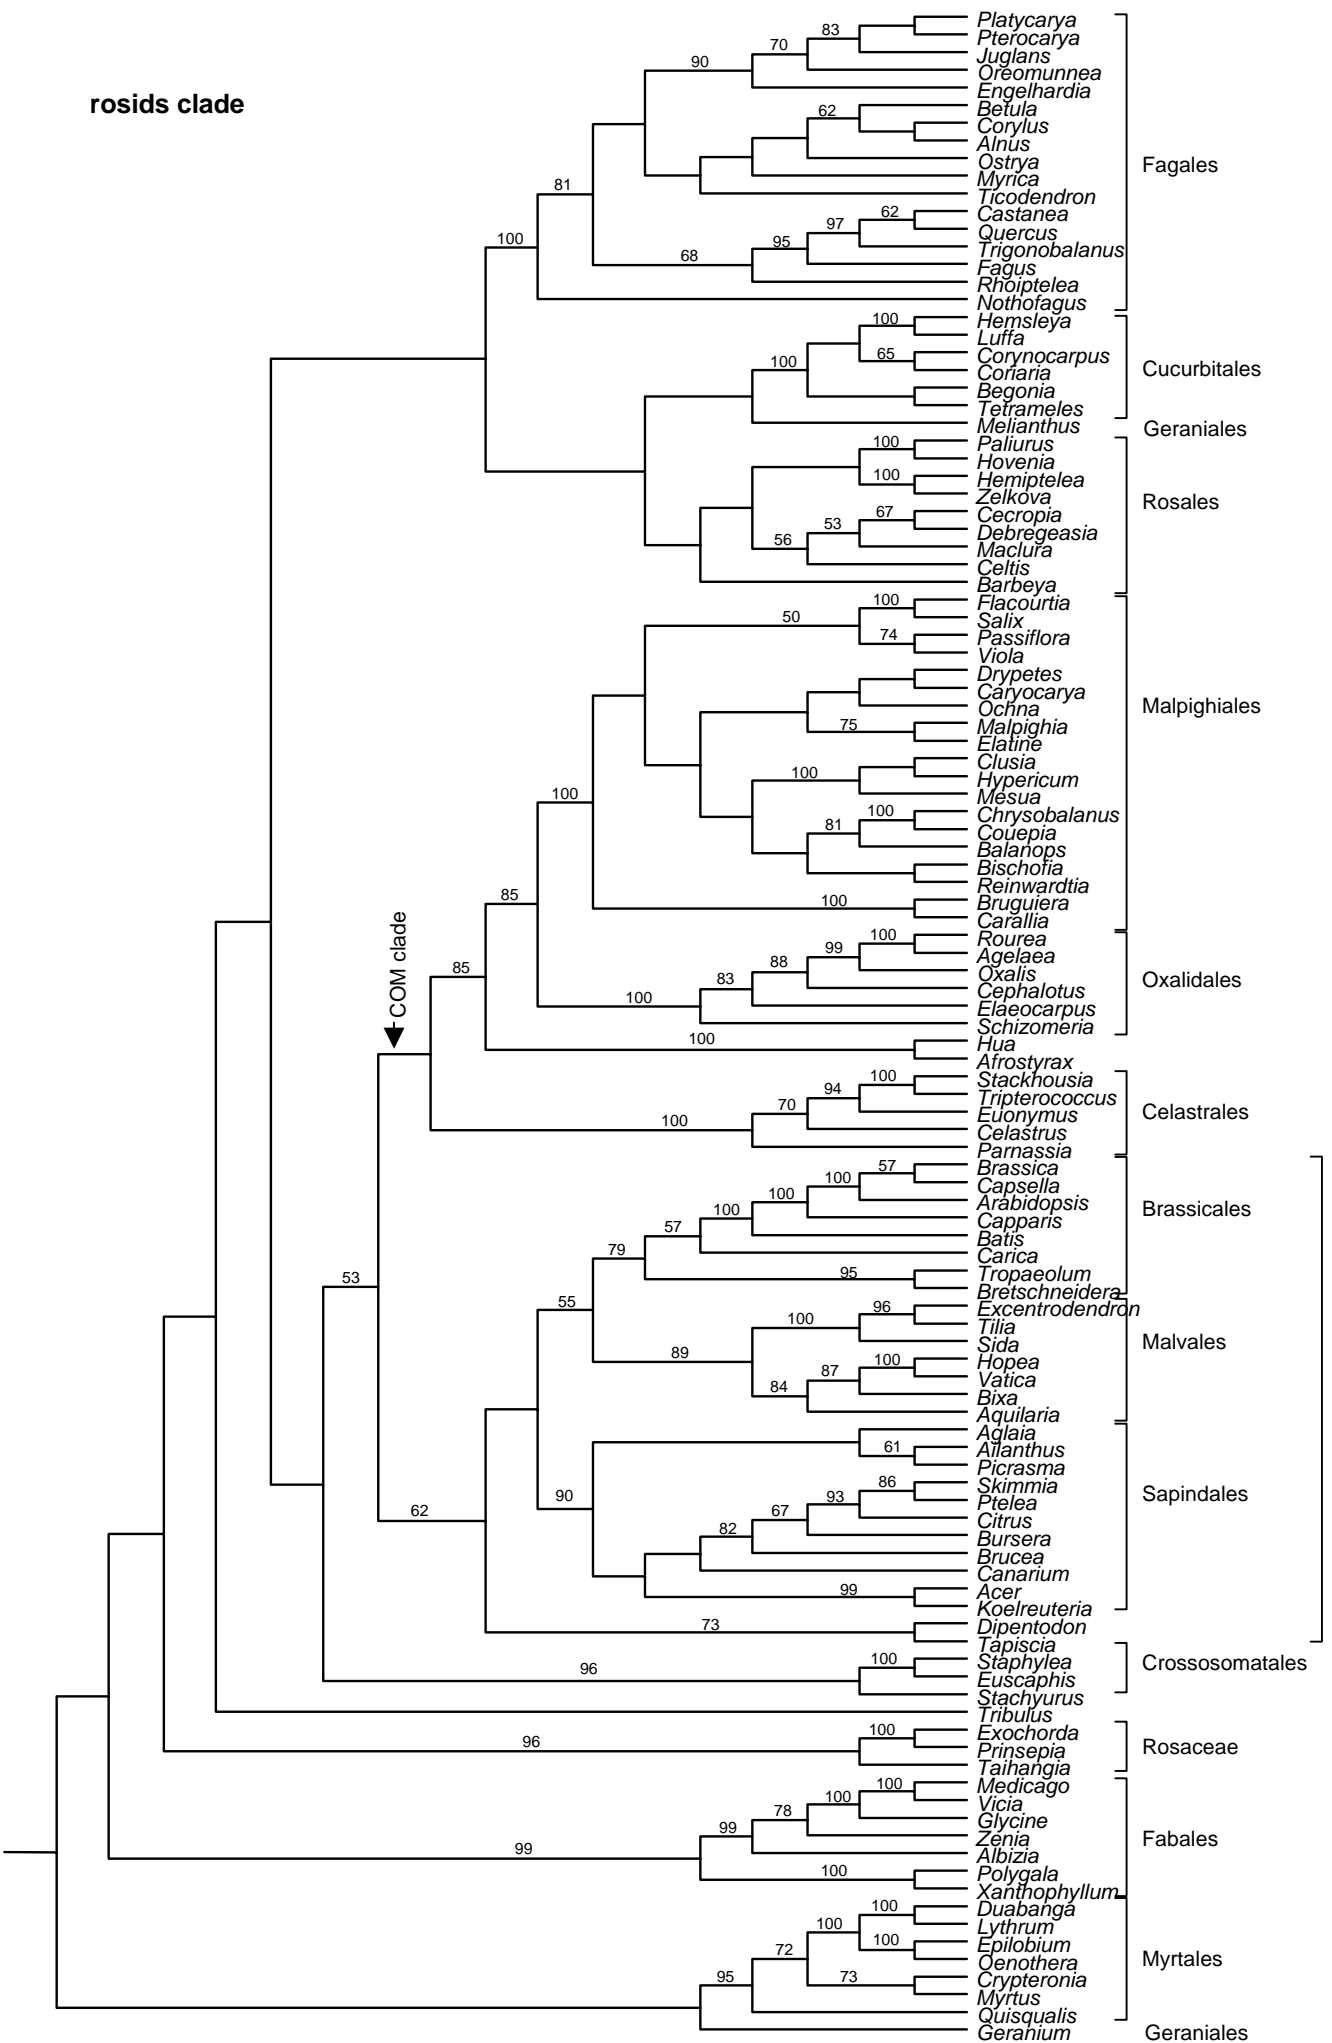

Supplement: 1471-2148-7-217-S8.pdf [file 1471-2148-7-217-S8.pdf]
